# Supplementary material for: Gene Amplification as a Mechanism of Yeast Adaptation to Nonsense Mutations in Release Factor Genes
Source: MDPI journal article supplement (doi:10.3390/genes12122019), 2021-12-19
Supplement: s1 [file s1]

## Gene amplification as a mechanism of yeast adaptation to nonsense mutations in release factor genes

Evgeniia M. Maksiutenko<sup>1,2</sup>, Yury A. Barbitoff<sup>1,3</sup>, Andrew G. Matveenko<sup>1</sup>, Svetlana E. Moskalenko<sup>1,2</sup>, Galina A. Zhouravleva<sup>1,4</sup>

<sup>1</sup> - Dpt. of Genetics and Biotechnology, St. Petersburg State University, St. Petersburg, Russia

<sup>2</sup> - St. Petersburg Branch, Vavilov Institute of General Genetics of the Russian Academy of Sciences, St. Petersburg, Russia

<sup>3</sup> - Bioinformatics Institute, St. Petersburg, Russia

<sup>4</sup> - Laboratory of Amyloid Biology, St. Petersburg State University, St. Petersburg, Russia

### Supplementary Tables

**Table S1.** Variants in the plasmids carrying mutant alleles *sup35-n* and *sup45-n*. Position and region annotations conform to the pRSU1 and pRS315-SUP45 maps (Supplementary File S1) in cases of *sup35* and *sup45* alleles, respectively.

| Allele           | Type      | Substitution | Position | Region             | Number of clones |
|------------------|-----------|--------------|----------|--------------------|------------------|
| <i>sup35-n</i>   | Insertion | T > TCTAG    | 5110     | MCS                | 34               |
| <i>sup35-21</i>  | SNP       | C > T        | 2964     | <i>SUP35</i> ORF   | 9                |
| <i>sup35-74</i>  | SNP       | C > T        | 2088     | <i>SUP35</i> ORF   | 8                |
| <i>sup35-74</i>  | SNP       | A > G        | 2391     | <i>SUP35</i> ORF   | 8                |
| <i>sup35-74</i>  | SNP       | A > G        | 2594     | <i>SUP35</i> ORF   | 8                |
| <i>sup35-74</i>  | SNP       | T > C        | 2800     | <i>SUP35</i> ORF   | 8                |
| <i>sup35-74</i>  | SNP       | T > C        | 10205    | Bacterial ori      | 8                |
| <i>sup35-218</i> | SNP       | G > T        | 2241     | <i>SUP35</i> ORF   | 9                |
| <i>sup35-218</i> | Deletion  | TTA > T      | 3849     | Unannotated region | 2                |
| <i>sup35-218</i> | Deletion  | GA > G       | 8463     | ARSH4              | 9                |
| <i>sup35-218</i> | SNP       | A > C        | 10117    | Bacterial ori      | 7                |

|                  |          |         |      |                        |    |
|------------------|----------|---------|------|------------------------|----|
| <i>sup35-240</i> | SNP      | C > T   | 1866 | <i>SUP35</i> ORF       | 8  |
| <i>sup35-240</i> | Deletion | TTA > T | 3849 | Unannotated region     | 1  |
| <i>sup45-n</i>   | SNP      | A > G   | 1715 | <i>SUP45</i> ORF       | 55 |
| <i>sup45-n</i>   | SNP      | G > T   | 2165 | <i>SUP45</i> ORF       | 55 |
| <i>sup45-n</i>   | SNP      | T > C   | 2333 | <i>SUP45</i> ORF       | 55 |
| <i>sup45-n</i>   | SNP      | T > A   | 2348 | <i>SUP45</i> ORF       | 55 |
| <i>sup45-n</i>   | SNP      | G > A   | 2573 | <i>SUP45</i> ORF       | 55 |
| <i>sup45-n</i>   | SNP      | T > C   | 2654 | <i>SUP45</i> ORF       | 55 |
| <i>sup45-101</i> | SNP      | A > T   | 1651 | <i>SUP45</i> ORF       | 2  |
| <i>sup45-101</i> | SNP      | G > T   | 2442 | <i>SUP45</i> ORF       | 11 |
| <i>sup45-102</i> | SNP      | T > A   | 1805 | <i>SUP45</i> ORF       | 11 |
| <i>sup45-104</i> | SNP      | T > A   | 2494 | <i>SUP45</i> ORF       | 11 |
| <i>sup45-105</i> | SNP      | A > T   | 891  | <i>SUP45</i> promoter  | 1  |
| <i>sup45-105</i> | SNP      | G > T   | 2799 | <i>SUP45</i> ORF       | 11 |
| <i>sup45-105</i> | SNP      | G > A   | 3380 | Unannotated region     | 1  |
| <i>sup45-105</i> | SNP      | G > A   | 6151 | Unannotated region     | 1  |
| <i>sup45-105</i> | Deletion | AT > A  | 6352 | <i>LEU2</i> terminator | 1  |
| <i>sup45-107</i> | SNP      | T > G   | 2596 | <i>SUP45</i> ORF       | 11 |

## Supplementary Figures

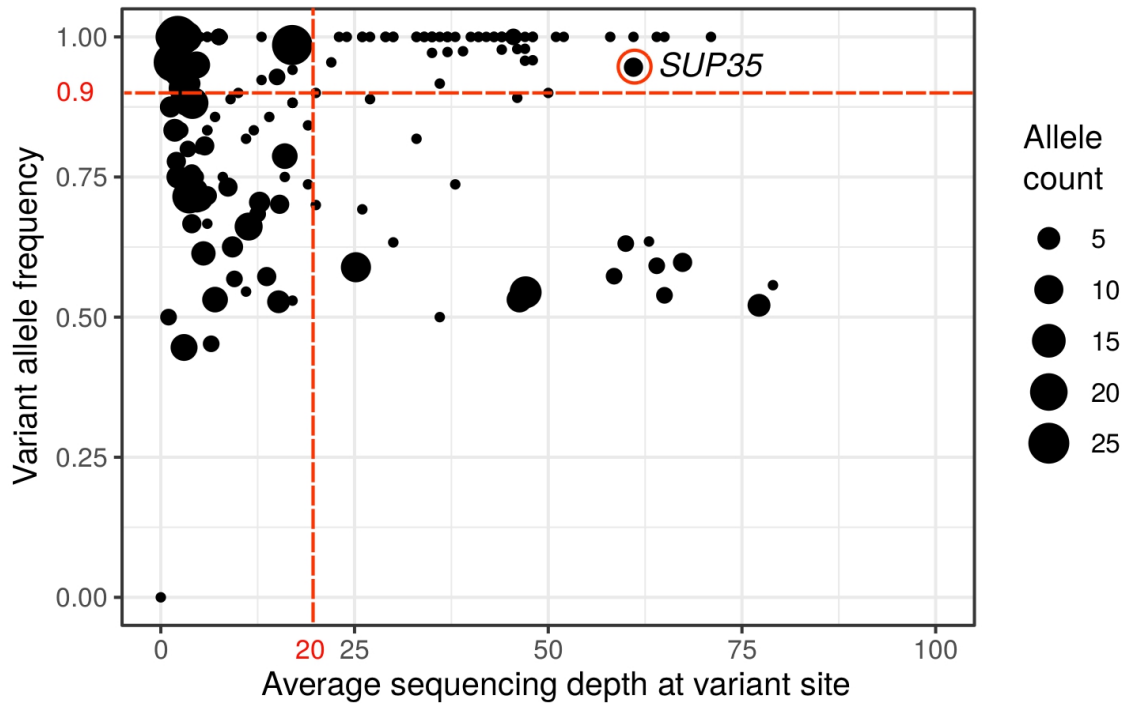

**Figure S1.** A scatter plot representing the results of variant calling against the reference genome sequence of the U-1A-D1628 strain. Each dot represent a variant site, size of the dot is proportional to the variant allele count in the set of 8

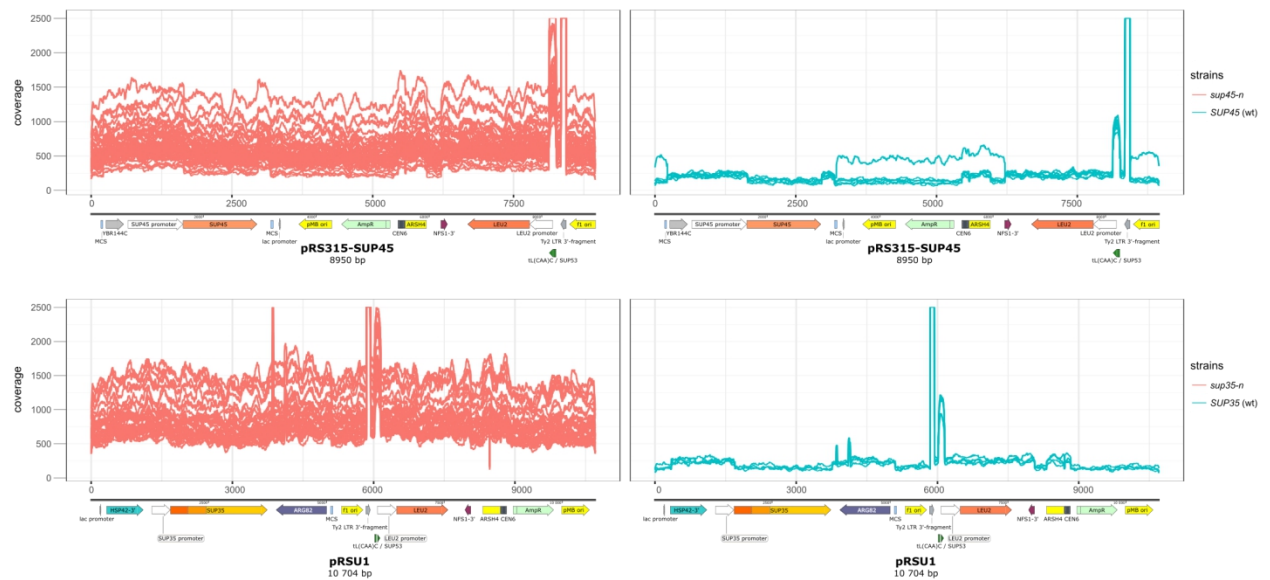

**Figure S2.** Coverage distribution in mutant and wild-type strains across plasmid sequences.

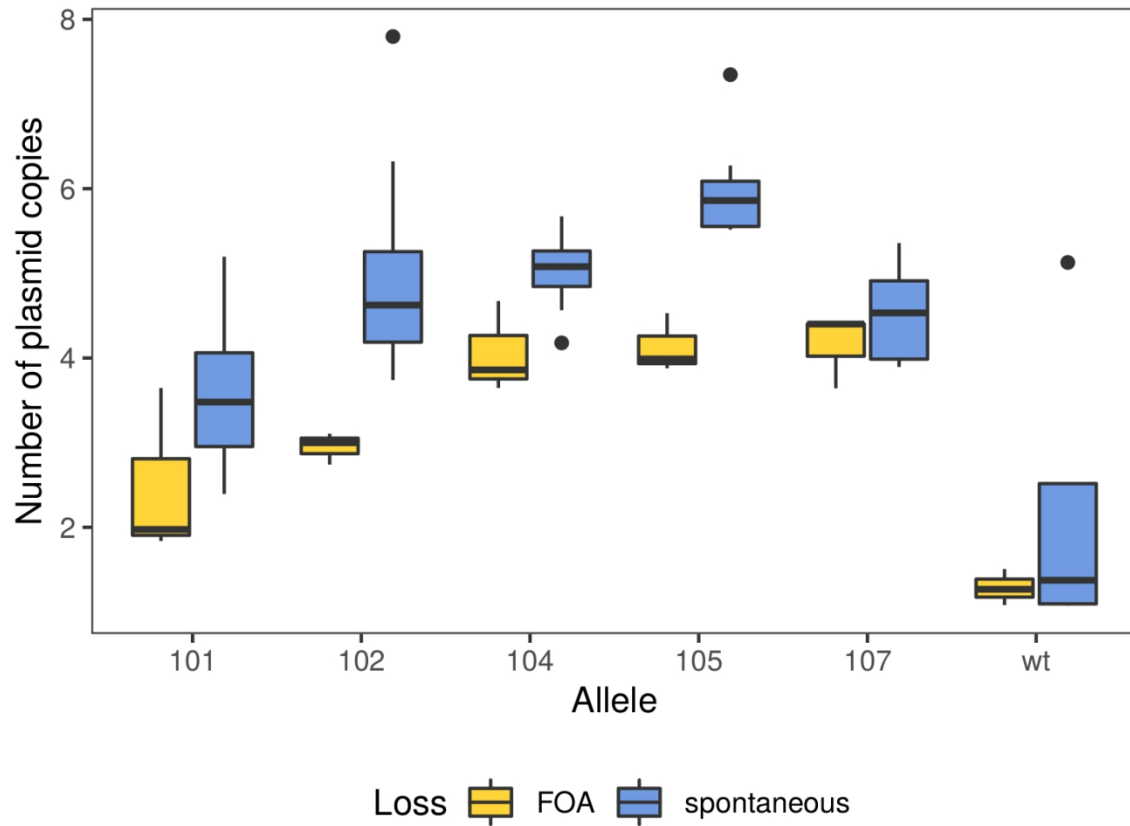

**Figure S3.** Plasmid copy number estimation in strains that were selected using 5-FOA (yellow) or spontaneously lost the plasmid containing the wild-type *SUP45* allele (blue).

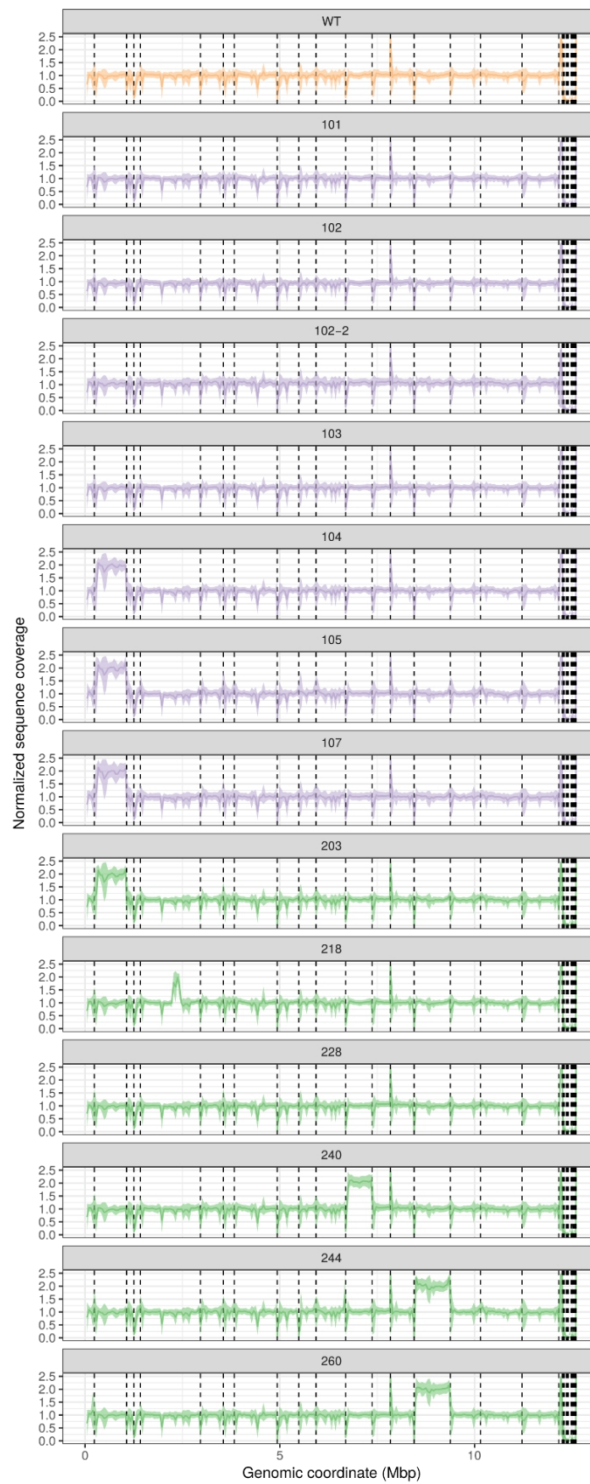

**Figure S4.** Normalized sequence coverage profiles for all 1B-D1606 strain derivatives analysed. Color corresponds to the mutant gene (orange - wild-type, purple - *sup45-n*, green - *sup35-n*) Dashed lines correspond to contig boundaries. Two clones from two different sources with confirmed *sup45-102* allele (denoted as “102” and “102-2”) were analyzed.

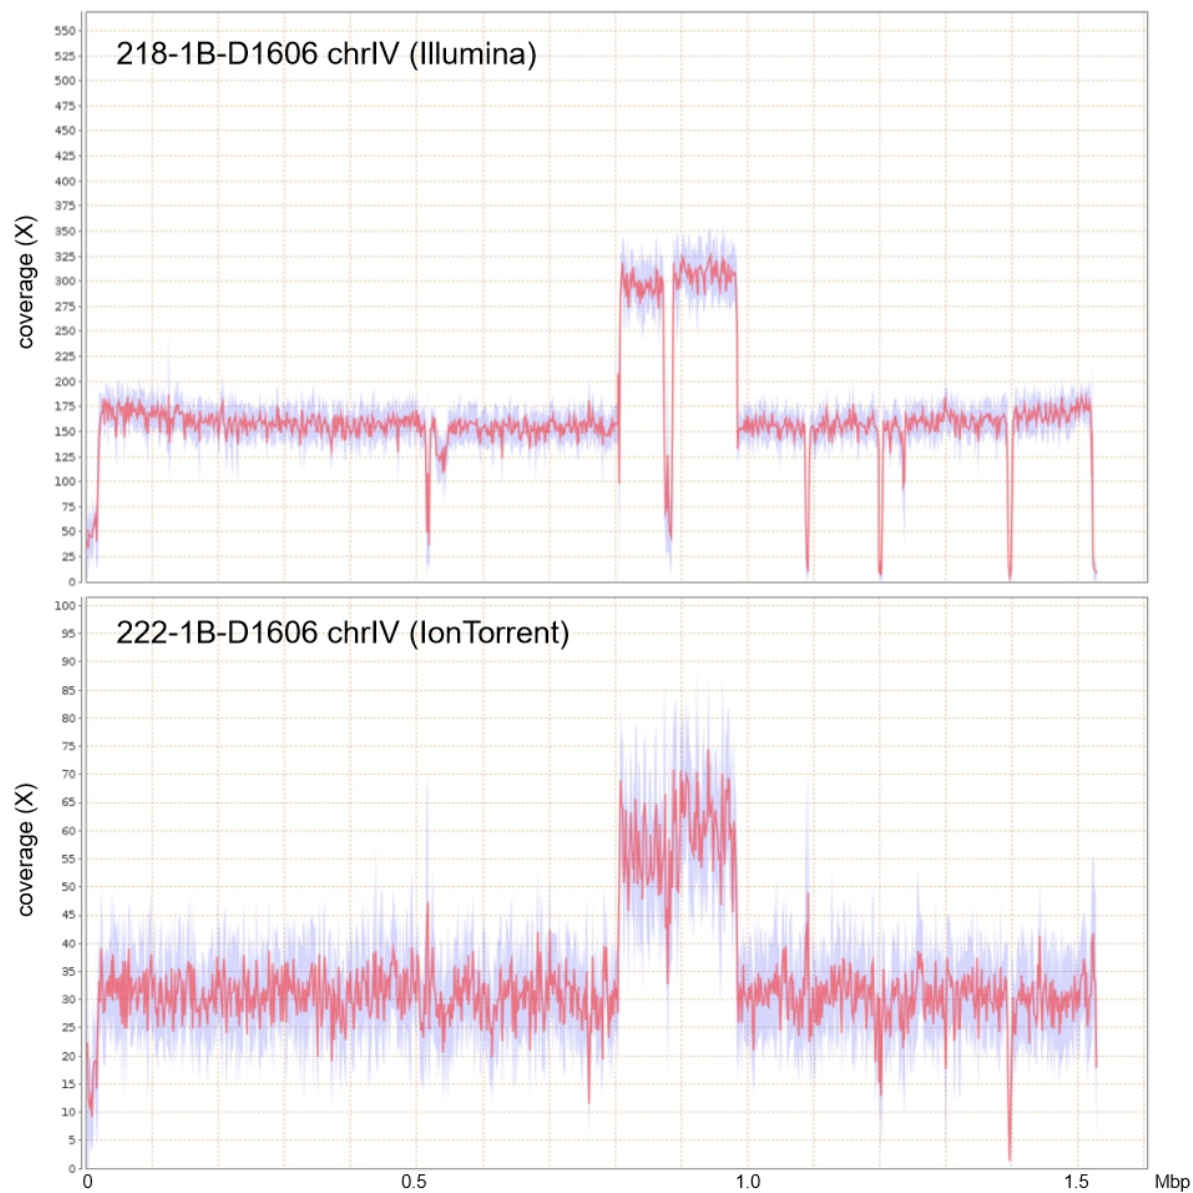

**Figure S5.** Comparison of the chromosome IV coverage profiles for the 218-1B-D1606 and 222-1B-D1606 sequences aligned onto the 74-D694 genome (Barbitoff et al., 2021).

**Supplementary File S1.** A ZIP archive containing plasmid sequences in the SnapGene format.
